# Supplementary material for: Maternal Bonding as a Protective Factor for Orthorexia Nervosa Risk in Dietetics Students
Source: MDPI journal article supplement (doi:10.3390/nu15163577), 2023-08-14
Supplement: s1 [file s1]

**Please find below the supplementary material of the article entitled ‘Maternal bonding as a protective factor for orthorexia nervosa risk in dietetic students’.**

**Table S1.** Association of ON risk as assessed by the ORTO-15 in Greek students of nutrition and dietetics (N=132) simultaneously with multiple variables (Multivariate logistic regression analysis).

| Variable                           | Estimate | P value | OR (95% CI)              |
|------------------------------------|----------|---------|--------------------------|
| Gender [female]                    | -0,214   | 0,824   | 0.807 (0.121 - 5.366)    |
| Age (years)                        | -0,084   | 0,354   | 0.92 (0.771 - 1.098)     |
| BMI [normal weight]                | 2,449    | 0,044   | 11.581 (1.074 - 124.915) |
| BMI [overweight]                   | 3,606    | 0,014   | 36.826 (2.059 - 658.506) |
| Years of Studies [>2]              | 0,462    | 0,56    | 1.586 (0.336 - 7.5)      |
| Chronic Disease [yes]              | -0,393   | 0,79    | 0.675 (0.038 - 12.074)   |
| Medication [yes]                   | -0,526   | 0,628   | 0.591 (0.07 - 4.958)     |
| Frequency Of Exercise [>4]         | 1,281    | 0,133   | 3.602 (0.677 - 19.173)   |
| Duration Of Exercise [>1]          | -0,717   | 0,253   | 0.488 (0.143 - 1.671)    |
| STAIT [moderate anxiety]           | 2,373    | 0,002   | 10.727 (2.454 - 46.889)  |
| STAIT [high anxiety]               | 1,699    | 0,014   | 5.467 (1.412 - 21.164)   |
| MedDiet [sufficient adherence]     | -0,262   | 0,707   | 0.77 (0.197 - 3.011)     |
| EAT-26                             |          |         |                          |
| [risk of eating disorders]         | 2,829    | 0,005   | 16.93 (2.397 - 119.577)  |
| BI-AAQ-5                           |          |         |                          |
| [risk of body image inflexibility] | 1,51     | 0,034   | 4.527 (1.12 - 18.304)    |
| Maternal Age (years)               | 0,037    | 0,657   | 1.038 (0.881 - 1.222)    |
| Maternal BMI [overweight]          | -0,233   | 0,714   | 0.792 (0.228 - 2.753)    |
| Maternal BI-AAQ-5                  |          |         |                          |
| [risk of body image inflexibility] | 0,585    | 0,341   | 1.796 (0.538 - 5.999)    |
| Maternal bonding (PBI)             |          |         |                          |
| [affectionless control]            | -1,023   | 0,294   | 0.36 (0.053 - 2.429)     |
| Maternal bonding (PBI)             |          |         |                          |
| [optimal parenting]                | -1,391   | 0,134   | 0.249 (0.04 - 1.535)     |
| Maternal bonding (PBI)             |          |         |                          |
| [affectionate constraint]          | -2,525   | 0,036   | 0.08 (0.008 - 0.852)     |
| Paternal Age (years)               | 0,015    | 0,813   | 1.015 (0.899 - 1.146)    |
| Paternal BMI [overweight]          | 1,18     | 0,115   | 3.254 (0.749 - 14.129)   |
| Paternal BI-AAQ-5                  |          |         |                          |
| [risk of body image inflexibility] | -0,437   | 0,573   | 0.646 (0.141 - 2.951)    |
| Paternal bonding (PBI)             |          |         |                          |
| [affectionless control]            | 0,917    | 0,246   | 2.502 (0.532 - 11.766)   |
| Paternal bonding (PBI)             |          |         |                          |
| [optimal parenting]                | 1,426    | 0,107   | 4.161 (0.736 - 23.523)   |
| Paternal bonding (PBI)             |          |         |                          |
| [affectionate constraint]          | 1,031    | 0,359   | 2.803 (0.31 - 25.339)    |

BMI=body mass index; MedDiet=Mediterranean diet; STAIT=State-Trait Anxiety Inventory; EAT-26=Eating Attitudes Test-26; BI-AAQ-5 = Body Image Acceptance & Action Questionnaire-5; PBI=Parental Bonding Instrument

\*  $p \leq 0.05$  was considered statistically significant.
